# Supplementary material for: Cardiovascular magnetic resonance insights into anomalies of the mitral valve apparatus in Fabry cardiomyopathy and hypertrophic cardiomyopathy
Source: PubMed Central journal article supplement (PMC11475249; doi:10.3389/fcvm.2024.1458705), 2024-09-30
Supplement: Table1.pdf [file Table1.pdf]

**Table 1S: Reproducibility analysis for papillary muscle anomalies measurements**

| <b>Intra-observer reproducibility</b> | <b>Bland Altman analysis<br/>(bias, LOA)</b> | <b>ICC<br/>(95% CI)</b> |
|---------------------------------------|----------------------------------------------|-------------------------|
| Dmax Al PM (mm)                       | 0.20 (4.36/-3.96)                            | 0.97(0.94-0.99)         |
| Dmax Pm PM (mm)                       | -0.23 (3.13/-3.60)                           | 0.97 (0.94-0.99)        |
| Anteriorization of Al PM (mm)         | -0.40 (4.47/-5.27)                           | 0.98 (0.95-0.99)        |
| AMVL length (mm)                      | 1.6 (6.74/-3.54)                             | 0.91 (0.74-0.96)        |
| <b>Inter-observer reproducibility</b> | <b>Bland Altman analysis<br/>(bias, LOA)</b> | <b>ICC<br/>(95% CI)</b> |
| Dmax Al PM (mm)                       | 0.58 (5.13/-4.46)                            | 0.95(0.92-0.98)         |
| Dmax Pm PM (mm)                       | 0.52 (4.98/-4.17)                            | 0.95 (0.93-0.98)        |
| Anteriorization of AL PM (mm)         | 0.7 (4.90/-4.48)                             | 0.94 (0.88-0.97)        |
| AMVL length (mm)                      | 1.9 (6.92/-4.35)                             | 0.89 (0.73-0.94)        |

Al PM, antero-lateral papillary muscle; AMVL, anterior mitral valve leaflet; CI, confidence interval; Dmax, maximum diameter; ICC, intraclass correlation coefficient, LOA, limits of agreement; Pm PM, postero-medial papillary muscle.
